# Supplementary material
Source: HighWire-hosted journal article supplement (https://bmjopenquality.bmj.com/content/8/4/e000547)

## Appendix 1: Process Mapping

### Process Mapping : Billing, Sample Collection to Report Preparation

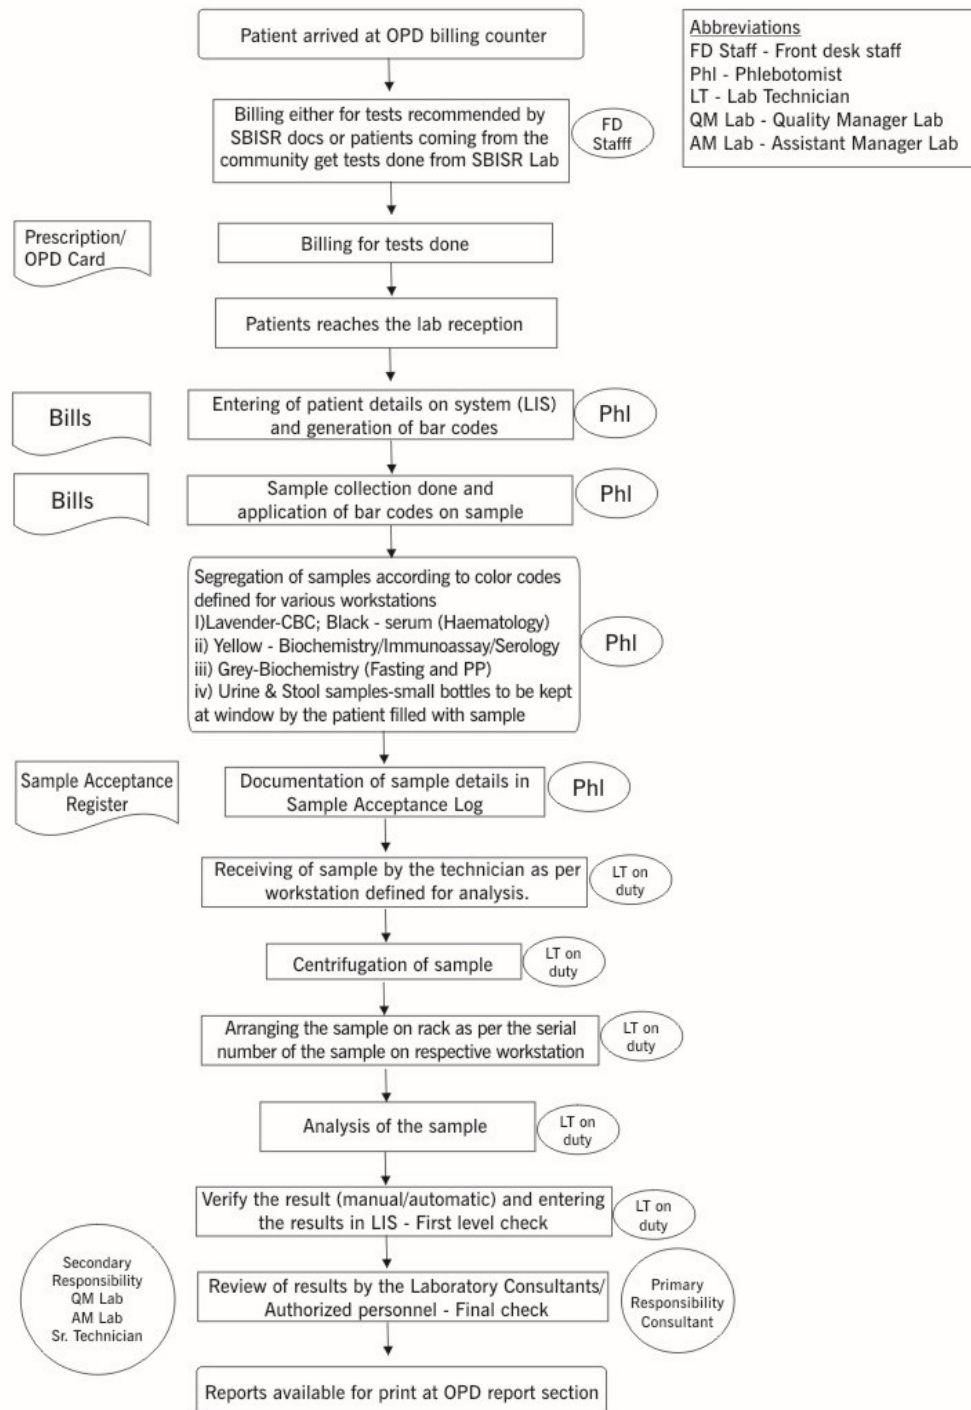

Supplement: inline-supplementary-material-1 [file inline-supplementary-material-1.pdf]
